# Supplementary material
Source: HighWire-hosted journal article supplement (https://www.cmajopen.ca/highwire/filestream/80849/field_highwire_adjunct_files/0/open-2015-0046-1-at.pdf)
Supplement: open-2015-0046-1-at.pdf [file open-2015-0046-1-at.pdf]

**Appendix 1 (as supplied by the authors): Distribution of subgroups depicting the proportion of hospital admissions for different injury sites based on (A) mechanism of injury, (B) sex, (C) age, (D) economic status and (E) geographic location.**

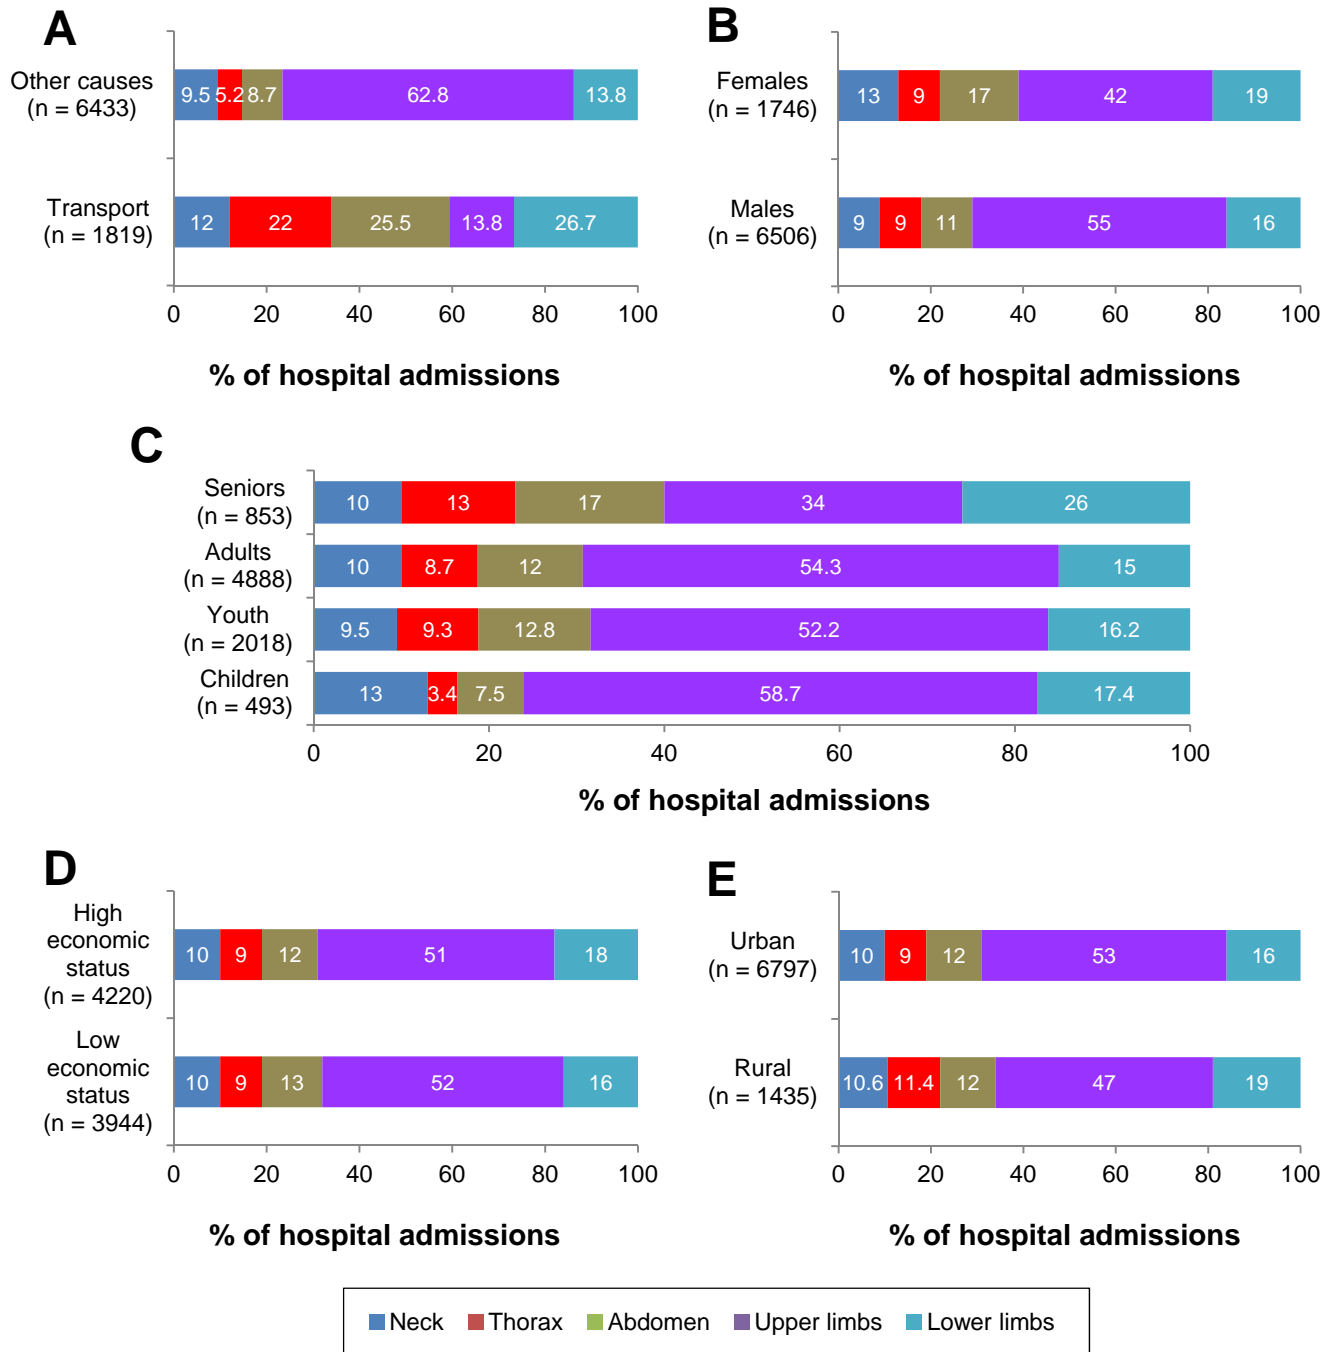

Appendix to: Altoijry A, Al-Omran M, Johnston KW, et al. Temporal trends in vascular trauma in Ontario, 1991–2009: a population-based study. *CMAJ Open* 2016. DOI:10.9778/cmajo.20150046.

Copyright © 2016 The Author(s) or their employer(s).  
To receive this resource in an accessible format, please contact us at [cmajgroup@cmaj.ca](mailto:cmajgroup@cmaj.ca).
